# Supplementary material for: A high performance wire-shaped flexible lithium-ion battery based on silicon nanoparticles within polypyrrole/twisted carbon fibers
Source: Royal Society of Chemistry journal article supplement (doi:10.1039/c7ra02051a), 2017-01-01
Supplement: c7ra02051a1.pdf [file c7ra02051a1.pdf]

Supplementary Information for

**A High Performance Wire-Shaped Flexible Lithium-Ion Battery Based  
on Silicon Nanoparticles within Polypyrrole/Twisted Carbon Fibers**

Jiangyu Rao,<sup>a</sup> Nishuang Liu,<sup>a</sup> Luying Li,<sup>a</sup> Jun Su,<sup>a</sup> Fei Long,<sup>b</sup> Zhengguang Zou<sup>b\*</sup> and Yihua Gao<sup>a\*</sup>

<sup>a</sup>Center for Nanoscale Characterization & Devices (CNCD), Wuhan National Laboratory for Optoelectronics (WNLO) and School of Physics, Huazhong University of Science and Technology (HUST), LuoyuRoad 1037, Wuhan 430074, P.R. China

<sup>b</sup>School of Material Science & Engineering, Guangxi Nonferrous Metals Mineral and Materials, Collaborative Innovation Center, Guilin University of Technology, Jian'ganRoad 12, Guilin 541004, Guangxi, P.R. China

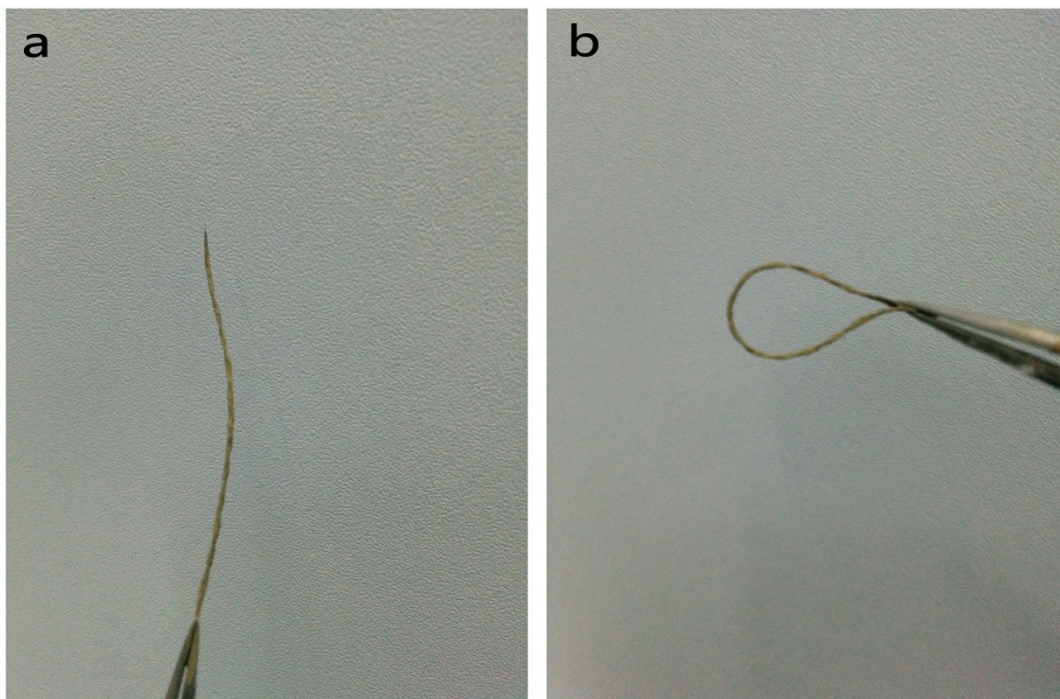

Figure S1. The flexibility of the Si/PPy/CFs.

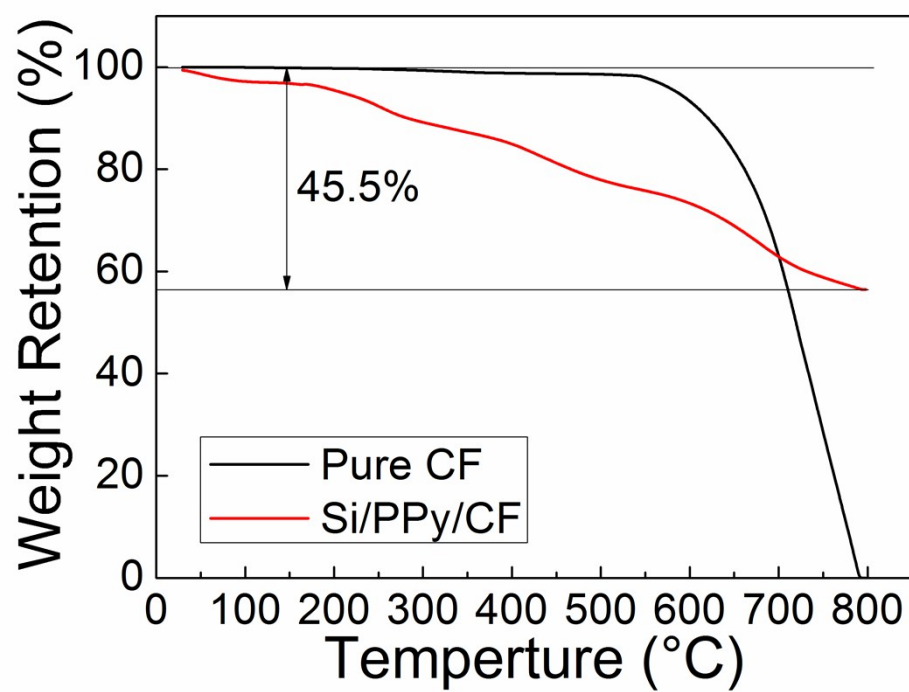

Figure S2. Thermogravimetric analysis of pure CF and Si/PPy/CFs in air.

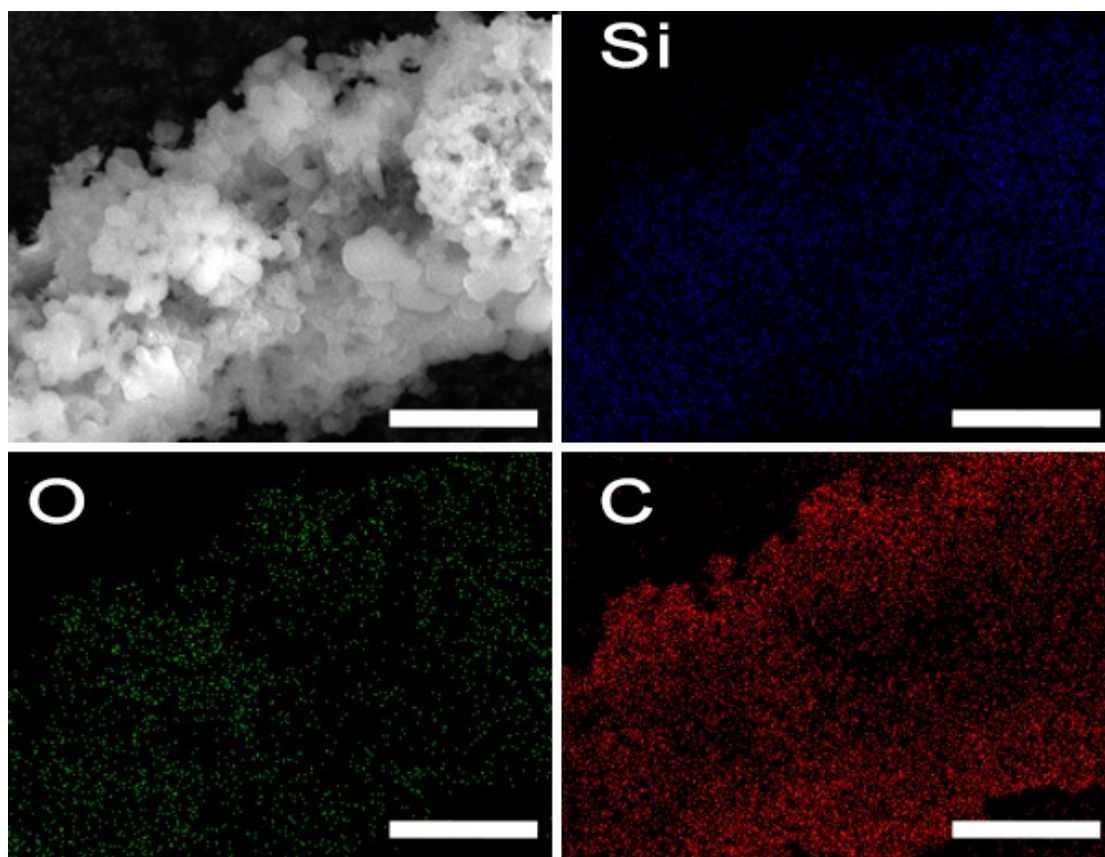

Figure S3. The Mapping images for Si/PPy/CFs. The C and Si elements were well dispersed, indicating the good interconnection in the Si/PPy/CFs electrode. The scale bar is 10  $\mu\text{m}$

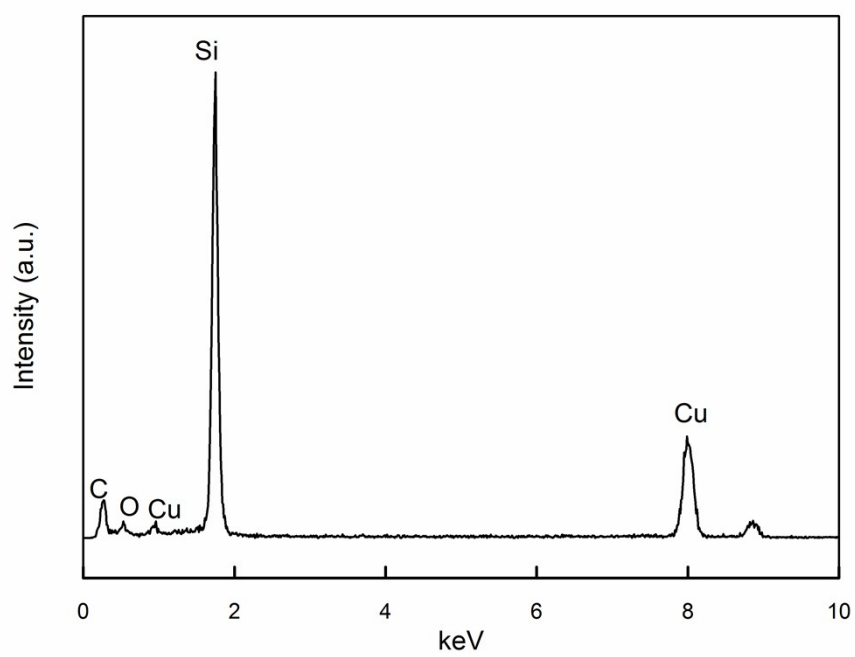

Figure S4. The EDAX pattern for Si/PPy/CFs composite.

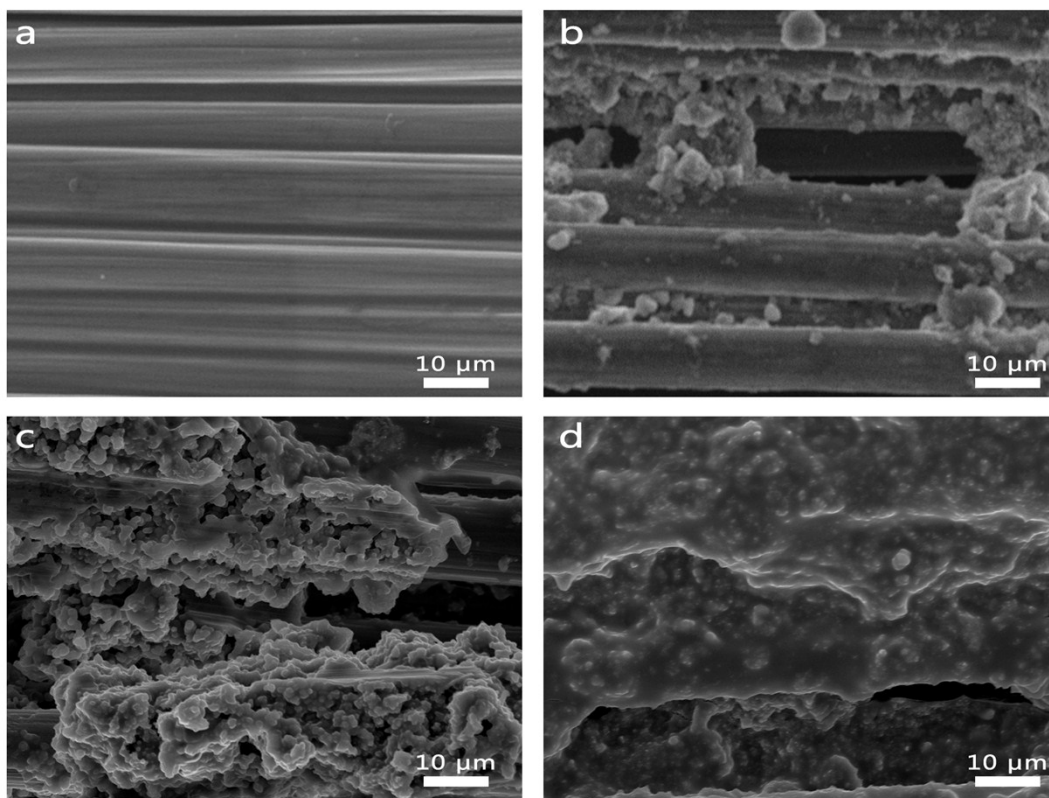

Figure S5. The SEM images of the Si/PPy/CFs with various PPy deposition time at 0s (a), 300s (b), 900s (c) and 1100s (d).

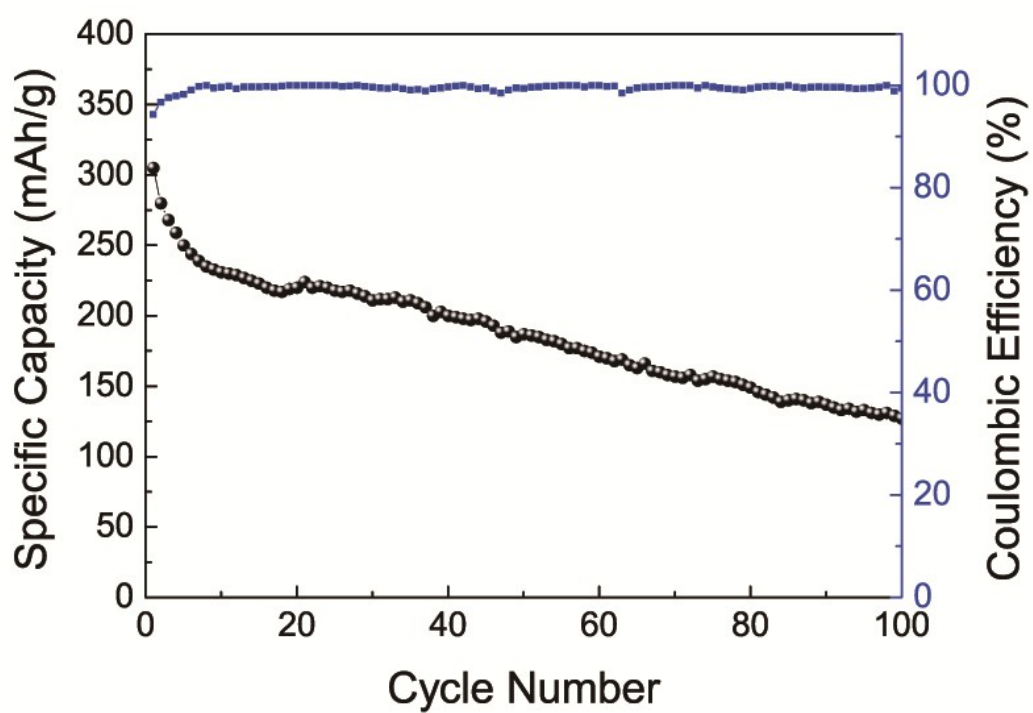

Figure S6. The specific capacities of the wire-type bare fibers with a PPy deposition time of 900s at a current density of 0.4 A/g. (1C=4 A/g)

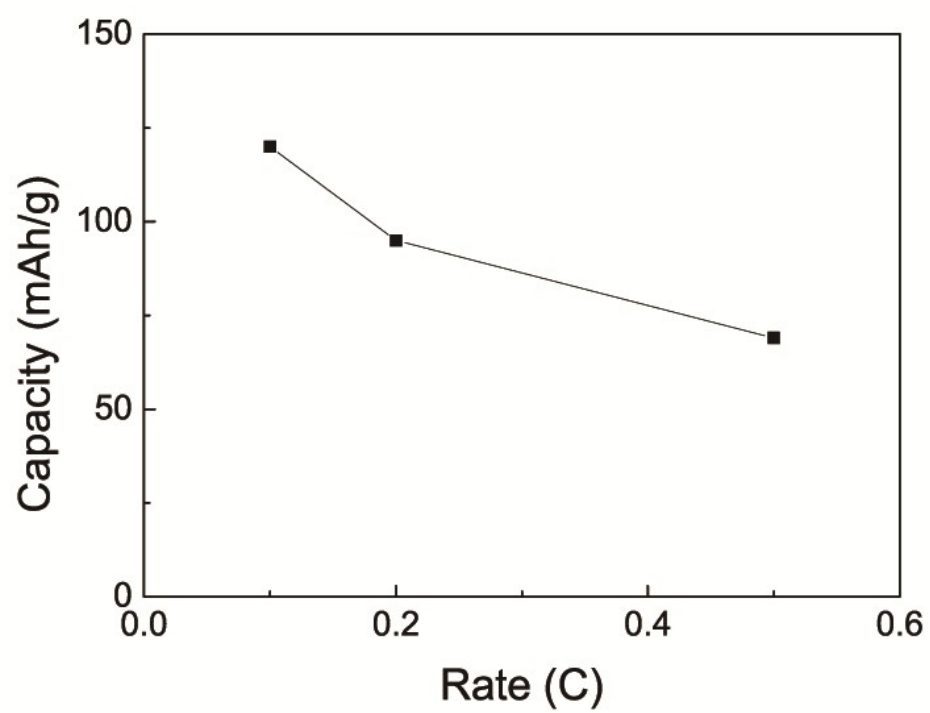

Figure S7. The rate performance of the wire-shaped PPy/CFs (900s) at 100mAh/g, 200mAh/g and 500mAh/g after 100 cycles.



| Materials       | Specific Capacity<br>(Calculated with<br>Silicon Only)       | Specific Capacity<br>(whole)                                | Rate capability<br>(Calculated with<br>Silicon Only) | Rate capability<br>(whole) | Flexibility<br>performance                  | Reference                         |
|-----------------|--------------------------------------------------------------|-------------------------------------------------------------|------------------------------------------------------|----------------------------|---------------------------------------------|-----------------------------------|
| Si@CNT          |                                                              | (1.0 A/g)<br>1670 mAh/g 1st cycle<br>1000 mAh/g 50th cycle  |                                                      | (3.0 A/g)<br>1050 mAh/g    | (2.0 A/g bending)<br>1460 mAh/g 100th cycle | Adv. Mater., 2014, 26,<br>1217    |
| Si NPs/PPy/CNT  | (0.4 A/g)<br>3000 mAh/g 1st cycle<br>1100 mAh/g 1000th cycle |                                                             | (8.3 A/g)<br>1000 mAh/g                              |                            |                                             | Nano Letter., 2013, 13,<br>3414   |
| PPy@PHSi        |                                                              | (1.0 A/g)<br>2400 mAh/g 1st cycle<br>2100 mAh/g 100th cycle |                                                      | (8.0 A/g)<br>661 mAh/g     |                                             | Adv. Mater., 2014, 26,<br>6145    |
| Si/PPy fiber    |                                                              | (0.3 A/g)<br>2854 mAh/g 1st cycle<br>611 mAh/g 200th cycle  |                                                      | (3.0 A/g)<br>300 mAh/g     |                                             | Chem. Commun., 2015,<br>51. 14590 |
| IP-Si@P-CNTs    |                                                              | (0.1 A/g)<br>1629 mAh/g 1st cycle<br>916 mAh/g 200th cycle  |                                                      | (2 A/g)<br>554 mAh/g       |                                             | Small, 2015,<br>11, 2314          |
| Sandwich Si&rGO |                                                              | (0.4 A/g)<br>1700 mAh/g 1st cycle<br>466 mAh/g 200th cycle  |                                                      | (1 A/g)<br>1000 mAh/g      |                                             | nanoscale, 2016,<br>8, 9511       |
| Si/PPy/CF       | (0.4 A/g)<br>3050 mAh/g 1st cycle<br>2287 mAh/g 1000th cycle | (0.4 A/g)<br>1802 mAh/g 1st cycle<br>1304 mAh/g 100th cycle | (16 A/g)<br>1000 mAh/g 100th<br>cycle                | (16 A/g)<br>545 mAh/g      | 0.4A/g bending<br>2197 mAh/g 100th cycle    | Our Work                          |

Figure S8. The performance comparison of our Si/PPy/CFs and other devices.

### **The Capacity Contributions from Polypyrrole and Carbon Fibre**

The capacity contributions from the PPy and CFs were calculated as follows. It should be particularly noted that the mass of PPy and CFs was not counted in the total mass of the active material following conventional capacity calculation in most reports, although it contributes to the total capacity.

Total Capacity= (Weight content of PPy and CFs)  $\times$  (Capacity of PPy and CFs) + (Weight content of Silicon)  $\times$  (Capacity of silicon)

$$45.5\% \times 308 \text{ mAh/g} + 54.5\% \times (\text{Capacity of silicon mAh/g}) = 1802 \text{ mAh/g},$$

$$\text{Capacity of silicon} = 3050 \text{ mAh/g}$$
